# Supplementary material
Source: bioRxiv or medRxiv preprint supplement (https://www.medrxiv.org/highwire/filestream/71900/field_highwire_adjunct_files/2/2020.02.06.20020610-3.pdf)
Supplement: Supplementary file [file 2020.02.06.20020610-3.pdf]

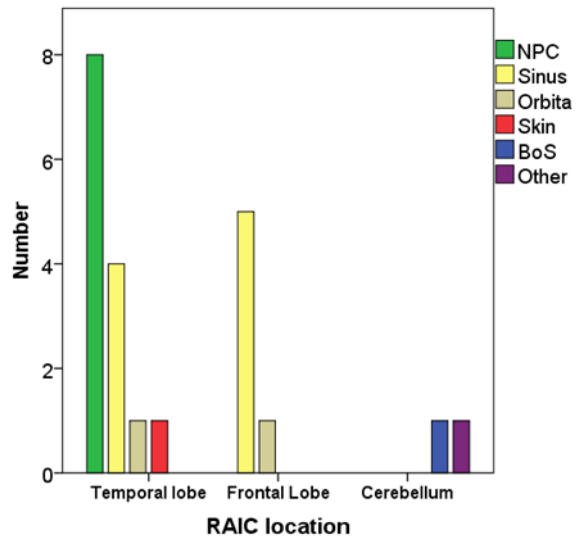

Figure 3: Location of RAIC according to initial disease site.
